# Supplementary material for: Hsa_circ_0054633 in Peripheral Blood Can be Used as a Diagnostic Biomarker of Pre-Diabetes and Type 2 Diabetes Mellitus
Source: Preprints.org preprint supplement (doi:10.20944/preprints201608.0225.v1), 2016-08-29
Supplement: Supplementary file 1 [file supplementary]

## Sheet: Sheet1
Upregulated	P value	Fold change	Downregulated	P value	Fold change	Downregulated	P value	Fold change
hsa_circ_0068087	0.00751009	3.22933	hsa_circ_0024204	<0.001	2.14474	hsa_circ_0129397	0.00196703	2.24156
hsa_circ_0054633	0.00458436	2.86168	hsa_circ_0038475	0.0170617	2.00007	hsa-circRNA12505-55	0.0414061	2.01526
hsa_circ_0124636	0.00178432	2.76614	hsa_circ_0115355	<0.001	2.54256	hsa_circ_0009070	0.00366649	2.08408
hsa_circ_0061113	0.0462251	2.63676	hsa_circ_0123377	<0.001	2.40681	hsa_circ_0092672	0.00257535	2.09428
hsa-circRNA13247-1	0.0280364	2.63251	hsa_circ_0057526	<0.001	2.03174	hsa_circ_0035593	0.00455648	2.01806
hsa_circ_0118599	0.0460784	2.61429	hsa-circRNA14362-13	0.00728816	2.04447	hsa_circ_0054734	0.00586892	3.05861
hsa-circRNA9652-1	0.0212525	2.61209	hsa-circRNA12505-40	0.00309536	2.08984	hsa_circ_0021780	<0.001	2.37507
hsa_circ_0139110	0.00908909	2.60401	hsa_circ_0099580	<0.001	2.99361	hsa_circ_0071855	<0.001	2.10714
hsa_circ_0062596	0.0182124	2.5471	hsa_circ_0132149	<0.001	2.24542	hsa-circRNA2177-30	<0.001	2.61385
hsa_circ_0062195	0.0463364	2.52434	hsa_circ_0099712	<0.001	2.09071	hsa_circ_0016278	0.0273533	2.31457
hsa_circ_0105688	0.022281	2.49594	hsa_circ_0002949	0.0163098	2.04151	hsa_circ_0109315	<0.001	2.01179
hsa_circ_0080192	0.0402159	2.45055	hsa_circ_0119824	0.00366974	2.25269	hsa_circ_0028010	0.00366406	2.40979
hsa_circ_0018508	0.00708832	2.40858	hsa-circRNA10051-8	0.00677783	2.27837	hsa_circ_0140073	<0.001	2.23728
hsa_circ_0133936	0.0155062	2.38739	hsa_circ_0083544	0.0128885	2.05557	hsa_circ_0039353	0.0035537	2.26848
hsa_circ_0092267	0.0379765	2.3807	hsa_circ_0120951	<0.001	2.60794	hsa_circ_0029681	<0.001	2.02843
hsa_circ_0081980	0.0126	2.36686	hsa_circ_0085163	<0.001	2.06885	hsa-circRNA10165-8	<0.001	2.2311
hsa_circ_0084597	0.0115649	2.36346	hsa_circ_0139952	0.00870416	2.38968	hsa-circRNA15265-3	<0.001	2.04723
hsa_circ_0103926	0.0107531	2.35872	hsa_circ_0138400	<0.001	2.07501	hsa_circ_0094900	<0.001	2.2614
hsa_circ_0066551	0.00310826	2.35069	hsa-circRNA2177-25	<0.001	2.63905	hsa-circRNA14910-11	<0.001	2.09281
hsa_circ_0011082	0.0479322	2.34151	hsa_circ_0087243	0.00338338	2.06069	hsa_circ_0095180	0.0483221	2.01038
hsa_circ_0082410	0.0316156	2.33831	hsa_circ_0023761	<0.001	2.05143	hsa_circ_0031862	0.0105743	2.09704
hsa_circ_0119529	0.00971667	2.32074	hsa_circ_0071857	<0.001	2.20064	hsa-circRNA1958-5	0.0116063	2.04897
hsa_circ_0003071	0.0485859	2.30854	hsa-circRNA1958-2	0.00242194	2.71453	hsa-circRNA5762-14	<0.001	2.04474
hsa_circ_0069264	0.0298879	2.30157	hsa_circ_0116853	0.00372175	2.05955	hsa_circ_0071865	<0.001	2.29668
hsa_circ_0111612	0.0470073	2.28588	hsa_circ_0085080	0.00238758	2.09457	hsa-circRNA6396-26	0.00788523	2.0516
hsa_circ_0075700	0.028119	2.27793	hsa_circ_0126845	<0.001	2.0799	hsa_circ_0087215	<0.001	2.02543
hsa_circ_0077770	0.00271307	2.27009	hsa_circ_0085445	0.0169809	2.10581	hsa-circRNA10329-63	0.0411706	2.04889
hsa_circ_0120470	0.0443112	2.25671	hsa_circ_0005684	<0.001	2.05111	hsa_circ_0117148	<0.001	2.25495
hsa_circ_0006010	0.00899449	2.24977	hsa_circ_0000673	<0.001	2.56343	hsa_circ_0120341	0.020424	2.25292
hsa_circ_0069862	0.0191471	2.2495	hsa_circ_0094904	<0.001	2.60534	hsa_circ_0053327	0.00259095	2.17597
hsa-circRNA4746-8	0.0300439	2.24692	hsa_circ_0134682	0.0165435	2.00812	hsa_circ_0027801	0.00119045	2.21981
hsa_circ_0054129	0.00132287	2.24097	hsa_circ_0021570	0.00168774	2.13815	hsa_circ_0025977	<0.001	2.18688
hsa_circ_0086623	0.0210391	2.23943	hsa_circ_0074770	<0.001	2.10412	hsa-circRNA15591-21	0.00767332	2.32886
hsa_circ_0007858	0.049341	2.23527	hsa_circ_0058526	<0.001	2.10844	hsa-circRNA3081-40	<0.001	2.0278
hsa_circ_0121546	0.0216199	2.21548	hsa_circ_0030737	<0.001	2.07151	hsa_circ_0004083	0.0135145	2.01336
hsa_circ_0026158	0.0163336	2.21023	hsa_circ_0028009	0.00179413	2.81526	hsa-circRNA5762-18	0.00136901	2.25083
hsa_circ_0028886	0.0258519	2.20974	hsa_circ_0103024	<0.001	2.1846	hsa_circ_0007090	0.00823748	2.08379
hsa_circ_0086409	0.00937442	2.20762	hsa-circRNA12910-7	<0.001	2.11154	hsa_circ_0025973	<0.001	2.36137
hsa_circ_0054647	0.0328166	2.19773	hsa_circ_0071841	<0.001	2.06964	hsa_circ_0060232	0.0419049	2.03646
hsa-circRNA11217	0.0173178	2.19398	hsa_circ_0123376	<0.001	2.06379	hsa_circ_0119707	0.00258323	2.14349
hsa_circ_0030004	0.00833273	2.17157	hsa_circ_0120335	0.00915889	2.14051	hsa-circRNA7969-7	0.00552877	2.08809
hsa_circ_0133005	0.00139266	2.16457	hsa_circ_0012364	0.0173503	2.10895	hsa_circ_0131079	<0.001	2.01632
hsa-circRNA15423-15	0.0286705	2.16175	hsa_circ_0086460	0.00601536	2.17236	hsa_circ_0001347	0.00440351	2.16006
hsa_circ_0043382	0.032319	2.13106	hsa_circ_0028967	0.00133726	2.05979	hsa_circ_0136924	0.0311394	2.08822
hsa_circ_0080517	0.014562	2.12912	hsa-circRNA6282-41	0.0122773	2.03407	hsa_circ_0044870	<0.001	2.06071
hsa_circ_0128150	0.0119395	2.12765	hsa_circ_0067587	<0.001	2.14383	hsa_circ_0047632	0.0283513	2.23237
hsa_circ_0057701	0.0449495	2.12666	hsa-circRNA949-20	<0.001	2.01484	hsa_circ_0101921	0.0139295	2.30866
hsa_circ_0033065	0.0335689	2.12455	hsa_circ_0053664	<0.001	2.05294	hsa_circ_0024206	0.00688625	2.21695
hsa_circ_0060806	0.038355	2.12315	hsa_circ_0135645	0.00343268	3.02754	hsa-circRNA15511-9	0.0154478	2.00761
hsa_circ_0102413	0.00898213	2.12222	hsa_circ_0054554	0.020688	2.1364	hsa_circ_0071390	0.0034009	2.1429
hsa_circ_0028442	0.0264754	2.11782	hsa_circ_0117150	<0.001	2.0391	hsa_circ_0038470	<0.001	2.23988
hsa_circ_0021637	0.0369641	2.11416	hsa_circ_0115373	<0.001	2.16306	hsa_circ_0134173	0.00365336	2.1009
hsa_circ_0122759	0.00242194	2.11097	hsa_circ_0037041	<0.001	2.0584	hsa_circ_0099702	<0.001	2.08442
hsa_circ_0126861	0.00114472	2.10252	hsa-circRNA3310-95	0.00546113	2.01086	hsa_circ_0119710	0.00201566	2.27065
hsa_circ_0047479	0.00692856	2.09611	hsa-circRNA12505-5	0.00308448	2.10796	hsa_circ_0129029	0.00743677	2.02469
hsa_circ_0129230	0.0260559	2.08962	hsa_circ_0001467	<0.001	2.35291	hsa_circ_0094899	0.00288962	2.91028
hsa_circ_0133090	0.0169233	2.08893	hsa_circ_0064736	<0.001	2.01014	hsa_circ_0023779	<0.001	2.22431
hsa_circ_0136091	0.0196861	2.08609	hsa_circ_0066868	<0.001	2.00528	hsa-circRNA15564-3	0.00333875	2.00526
hsa_circ_0010879	0.00787355	2.07347	hsa_circ_0013616	<0.001	2.05069	hsa_circ_0132592	0.0109863	2.07686
hsa_circ_0100191	0.0168213	2.07299	hsa_circ_0028966	<0.001	2.0802	hsa_circ_0040358	0.0191911	2.04364
hsa_circ_0050044	0.039758	2.0722	hsa_circ_0092511	0.0125014	2.39111	hsa_circ_0105527	<0.001	3.1888
hsa_circ_0054646	0.0118212	2.06954	hsa_circ_0053636	0.0266782	2.00019	hsa_circ_0066232	0.00299019	2.21061
hsa_circ_0090453	0.0394336	2.04903	hsa_circ_0025979	<0.001	2.06135	hsa_circ_0117152	<0.001	2.0329
hsa_circ_0061012	0.00923612	2.04781	hsa-circRNA6213-4	<0.001	2.08149	hsa_circ_0035597	0.00928959	2.03827
hsa_circ_0130694	0.033974	2.04701	hsa_circ_0085446	0.00255682	2.02557	hsa_circ_0121926	0.0350216	2.11583
hsa-circRNA3289	0.00671678	2.0453	hsa_circ_0119159	<0.001	2.08554	hsa_circ_0054555	<0.001	2.5554
hsa_circ_0048884	0.00341073	2.0414	hsa_circ_0067586	<0.001	2.09557	hsa_circ_0025985	<0.001	2.17573
hsa_circ_0126764	0.0169845	2.02204	hsa_circ_0031047	0.0121616	2.16586	hsa_circ_0041697	<0.001	2.63605
hsa-circRNA12986-3	0.0443417	2.02071	hsa_circ_0089925	0.00478478	2.31438	hsa_circ_0000544	<0.001	2.03799
hsa_circ_0106442	0.0324644	2.01971	hsa_circ_0108704	0.0187277	2.1024	hsa_circ_0110429	<0.001	2.08275
hsa_circ_0026455	0.0270861	2.01781	hsa_circ_0054812	0.00139931	2.17518	hsa_circ_0049355	0.0139547	2.29353
hsa-circRNA5933-3	0.0173895	2.01678	hsa-circRNA12883-19	<0.001	2.13178	hsa_circ_0076215	0.0189595	2.38324
hsa_circ_0023866	0.0309858	2.01587	hsa_circ_0056990	0.0138202	2.33625	hsa_circ_0054731	<0.001	2.13975
hsa_circ_0061787	0.0256623	2.00967	hsa_circ_0015676	0.00429285	2.01026	hsa_circ_0140074	0.00254992	2.03119
hsa_circ_0092576	0.0483368	2.00408	hsa_circ_0096843	0.00320102	2.40727	hsa_circ_0117173	0.00545093	2.11103
hsa_circ_0065692	0.0238334	2.00303	hsa_circ_0057529	<0.001	2.11757	hsa-circRNA8659-9	<0.001	2.16836
hsa_circ_0111976	0.00534345	2.00124	hsa_circ_0098946	<0.001	2.07452	hsa_circ_0120602	0.00390884	2.14608
hsa_circ_0128506	0.00590278	2.00097	hsa_circ_0002316	0.0264017	2.02882	hsa_circ_0119827	<0.001	2.21542
			hsa-circRNA16072-9	<0.001	2.20363	hsa_circ_0120560	<0.001	2.27357
			hsa_circ_0047877	<0.001	2.02356	hsa_circ_0017335	<0.001	2.23358
			hsa_circ_0071866	<0.001	2.12136	hsa_circ_0024215	<0.001	2.06455
			hsa_circ_0140077	<0.001	2.59368	hsa_circ_0115372	<0.001	2.20428
			hsa_circ_0126894	0.00271527	2.20381	hsa_circ_0093710	0.00531119	2.3647
			hsa_circ_0134291	0.00163235	2.01382	hsa_circ_0095347	0.0026638	2.26854
			hsa-circRNA12505-2	<0.001	2.33139	hsa_circ_0037889	<0.001	2.07718
			hsa_circ_0091155	<0.001	2.23142	hsa-circRNA7944-6	0.0101104	2.37471
			hsa_circ_0129896	<0.001	2.29265	hsa-circRNA10450-30	0.00208239	2.30298
			hsa_circ_0101628	0.00296609	2.1023	hsa_circ_0071229	<0.001	2.00678
			hsa_circ_0040028	<0.001	2.51398	hsa_circ_0127538	0.0153516	2.15396
			hsa_circ_0118394	0.0012282	2.04205	hsa-circRNA12505-31	<0.001	2.22555
			hsa-circRNA12505-26	<0.001	2.15393	hsa_circ_0047373	0.00861141	2.09467
			hsa_circ_0030740	<0.001	3.12483	hsa_circ_0129396	<0.001	2.273
			hsa_circ_0054778	<0.001	2.68378	hsa_circ_0140563	<0.001	2.01099
			hsa_circ_0003905	0.00104482	2.22336	hsa_circ_0073470	<0.001	2.57411
			hsa_circ_0069228	<0.001	2.4188	hsa_circ_0038472	<0.001	2.01311
			hsa-circRNA14020-21	<0.001	2.17352	hsa-circRNA15591-31	0.00189274	2.25334
			hsa_circ_0117499	<0.001	2.07621	hsa_circ_0083837	0.0340432	2.39736
			hsa_circ_0071853	<0.001	2.07892	hsa_circ_0106175	0.00432967	2.04012
			hsa_circ_0016817	0.0274706	2.20343	hsa_circ_0124317	0.00656428	2.3011
			hsa_circ_0069533	0.00325041	2.02157	hsa_circ_0053760	0.00634866	2.07208
			hsa_circ_0117183	<0.001	2.00089	hsa_circ_0052756	0.00257631	2.01619
			hsa_circ_0118288	0.0078808	2.10601	hsa_circ_0105886	<0.001	2.36567
			hsa_circ_0091154	<0.001	2.0306	hsa_circ_0030731	<0.001	2.54434
			hsa_circ_0009133	0.00616611	2.09349	hsa_circ_0094884	<0.001	2.02104
			hsa_circ_0047651	<0.001	2.04625	hsa_circ_0127463	<0.001	2.06253
			hsa_circ_0111501	<0.001	2.0327	hsa_circ_0083169	<0.001	2.02967
			hsa_circ_0089932	0.0187257	2.14665	hsa_circ_0096518	<0.001	2.10844
			hsa_circ_0088295	<0.001	2.00327	hsa_circ_0023757	0.00171461	2.05456
			hsa_circ_0077656	<0.001	2.00342	hsa-circRNA5011-23	<0.001	2.22694
			hsa_circ_0054095	<0.001	2.03392	hsa_circ_0023780	<0.001	2.05753
			hsa_circ_0120954	0.00144231	2.72016	hsa_circ_0084642	0.00426991	2.46773
			hsa_circ_0104186	0.00273266	2.48284	hsa-circRNA10656-34	<0.001	2.06503
			hsa_circ_0140078	<0.001	2.22787	hsa-circRNA12520-172	<0.001	2.10784
			hsa_circ_0114306	0.0241166	2.00491	hsa_circ_0105778	0.00137107	2.22205
			hsa-circRNA14317-3	<0.001	2.339	hsa_circ_0098355	0.00382841	2.45006
			hsa_circ_0114302	<0.001	2.41311	hsa-circRNA409-3	<0.001	2.16766
			hsa-circRNA10051-11	0.0163336	2.11954	hsa_circ_0104551	<0.001	2.13706
			hsa_circ_0028968	0.00163884	2.17299	hsa_circ_0030739	<0.001	2.56426
			hsa_circ_0009036	<0.001	2.20046	hsa_circ_0120604	0.0047876	2.09151
			hsa_circ_0015678	0.00156031	2.08323	hsa_circ_0106657	0.00182224	2.06497
			hsa_circ_0099436	0.0305176	2.597	hsa_circ_0057764	0.0158945	2.39453
			hsa_circ_0053329	<0.001	2.17137	hsa_circ_0099711	<0.001	3.09711
			hsa_circ_0071220	<0.001	2.09071	hsa_circ_0099990	<0.001	2.0769
			hsa_circ_0127531	0.0452714	2.75765	hsa_circ_0033112	<0.001	2.1107
			hsa_circ_0028965	<0.001	2.06254	hsa-circRNA11806-28	<0.001	2.65364
			hsa_circ_0028008	0.0080128	2.1603	hsa_circ_0132239	0.00174099	2.12072
			hsa_circ_0023773	0.00106242	2.20742	hsa_circ_0104275	<0.001	2.07761
			hsa_circ_0107665	0.0219362	2.39721	hsa_circ_0054730	0.00198092	2.21248
			hsa_circ_0038250	0.00119085	2.29516	hsa-circRNA2591-9	0.00167633	2.02281
			hsa_circ_0138403	<0.001	2.09712	hsa-circRNA7550-33	<0.001	2.13182
			hsa_circ_0053641	<0.001	2.3313	hsa-circRNA2198-7	0.00712154	2.43755
			hsa_circ_0139201	<0.001	2.02503	hsa_circ_0120323	<0.001	2.00252
			hsa_circ_0037887	<0.001	2.50297	hsa_circ_0120339	<0.001	2.20467
			hsa_circ_0031939	0.0439452	2.32189	hsa_circ_0008855	<0.001	2.22991
			hsa-circRNA6756-36	<0.001	2.02603	hsa-circRNA4610-36	<0.001	2.14383
			hsa_circ_0069397	<0.001	2.12856	hsa_circ_0120342	0.00121448	2.07543
			hsa_circ_0140287	<0.001	2.06742	hsa_circ_0054761	<0.001	2.25118
			hsa_circ_0067588	<0.001	2.13234	hsa-circRNA12505-51	0.00222201	2.1725
			hsa-circRNA7697-20	0.0193178	2.33056	hsa-circRNA12520-126	<0.001	2.31251
			hsa_circ_0130488	<0.001	2.06664	hsa_circ_0041155	0.00283902	2.0239
			hsa-circRNA2198-13	0.00298952	2.6926	hsa_circ_0084643	0.00679236	2.39183
			hsa_circ_0054728	0.00351671	2.11168	hsa_circ_0120607	<0.001	2.29904
			hsa_circ_0138402	0.00127427	2.03853	hsa_circ_0027702	0.0179154	2.60358
			hsa-circRNA16072-18	<0.001	2.03118	hsa_circ_0075564	<0.001	2.25914
			hsa_circ_0069532	0.016327	2.05207	hsa-circRNA8505-7	<0.001	2.15927
			hsa-circRNA12693-13	<0.001	2.03813	hsa_circ_0140076	<0.001	2.36869
			hsa_circ_0026573	0.0100395	2.36747	hsa_circ_0138382	<0.001	2.35638
			hsa-circRNA9015-34	<0.001	2.55366	hsa_circ_0071858	<0.001	2.09875
			hsa-circRNA3487-6	<0.001	2.43453	hsa_circ_0029812	0.0167626	2.05246
			hsa_circ_0075045	0.00346062	2.03085	hsa_circ_0031081	0.0300425	2.01232
			hsa-circRNA10767	0.00649016	2.01809	hsa_circ_0030732	<0.001	2.64179
			hsa_circ_0072732	0.00181508	2.40277	hsa_circ_0015672	0.00534524	2.03436
			hsa_circ_0127462	<0.001	2.01184	hsa_circ_0111502	<0.001	2.16254
			hsa_circ_0105010	<0.001	2.48006	hsa_circ_0134171	0.00482715	2.30102
			hsa_circ_0081889	<0.001	2.13844	hsa_circ_0016397	<0.001	2.3572
			hsa_circ_0129104	0.0215675	2.63584	hsa_circ_0001168	0.00495096	2.07106
			hsa-circRNA15514-9	<0.001	2.10783	hsa-circRNA10072-4	<0.001	2.00246
			hsa_circ_0085406	<0.001	2.65126	hsa-circRNA7550-9	<0.001	2.12711
			hsa_circ_0084645	0.00610066	2.49958	hsa-circRNA5854-5	0.00966896	2.01563
			hsa_circ_0133355	0.0070427	2.52841	hsa_circ_0022301	0.00314416	2.15591
			hsa-circRNA12520-159	0.00104657	2.21613	hsa-circRNA6489-15	<0.001	2.13182
			hsa-circRNA4380-15	<0.001	2.06506	hsa_circ_0120605	0.00834416	2.01917
			hsa_circ_0136904	<0.001	2.36491	hsa-circRNA3081-2	<0.001	2.05738
			hsa_circ_0039423	0.00133675	2.10362	hsa-circRNA7104-135	<0.001	2.04399
			hsa_circ_0069410	0.0137028	2.02809	hsa_circ_0122354	0.00165557	2.01786
			hsa_circ_0013489	<0.001	2.32544	hsa-circRNA4388-10	0.00320669	2.32278
			hsa_circ_0005567	0.00734054	2.00706	hsa_circ_0087212	<0.001	2.32558
			hsa_circ_0136060	0.0307653	2.01222	hsa_circ_0140534	<0.001	2.31878
			hsa-circRNA6510-1	<0.001	2.37688	hsa_circ_0140292	<0.001	2.61429
			hsa_circ_0057280	0.0158501	2.42942	hsa-circRNA7697-35	0.00398221	2.02484
			hsa_circ_0073828	<0.001	2.02639	hsa_circ_0092459	0.00727567	2.01561
			hsa_circ_0126693	0.00387513	2.18865	hsa_circ_0079321	0.0239811	2.0043
			hsa-circRNA9640-24	<0.001	2.04852	hsa_circ_0077414	0.00802004	2.02425
			hsa_circ_0085444	0.00175639	2.0924	hsa_circ_0112542	0.00103724	2.10462
			hsa-circRNA15511-5	0.00381495	2.20965	hsa_circ_0025441	0.002727	2.65412
			hsa-circRNA9274-3	0.0231469	2.00692	hsa_circ_0047630	<0.001	2.5867
			hsa_circ_0001494	0.0128445	2.1802	hsa_circ_0120559	<0.001	2.13731
			hsa_circ_0001774	0.00104477	2.0053	hsa_circ_0022919	0.0312766	2.35728
			hsa_circ_0054985	<0.001	2.2148	hsa_circ_0076400	<0.001	2.06701
			hsa_circ_0066238	<0.001	2.22632	hsa_circ_0031863	0.00986036	2.04999
			hsa_circ_0127537	<0.001	2.23854	hsa-circRNA12505-15	0.00118036	2.46106
			hsa_circ_0137811	<0.001	2.1033	hsa_circ_0054726	<0.001	2.38311
			hsa_circ_0130333	<0.001	2.21949	hsa_circ_0120606	<0.001	2.2124
			hsa_circ_0007018	<0.001	2.15673	hsa_circ_0000849	<0.001	2.07214
			hsa_circ_0078516	0.00411894	2.05391	hsa_circ_0135075	<0.001	2.13854
			hsa_circ_0119156	0.0142489	2.26598	hsa_circ_0122182	0.00245392	2.09465
			hsa_circ_0055894	<0.001	2.0148	hsa-circRNA7619-1	0.0337268	2.17885
			hsa-circRNA14588-10	<0.001	2.20785	hsa_circ_0094898	<0.001	2.09696
			hsa_circ_0011826	<0.001	2.10535	hsa_circ_0053665	0.00183615	2.05975
			hsa_circ_0060740	<0.001	2.18066	hsa_circ_0126352	0.0470452	2.27748
			hsa_circ_0027365	<0.001	2.07813	hsa_circ_0051623	0.0481366	2.00971
			hsa_circ_0075043	0.00713078	3.13686	hsa_circ_0140081	<0.001	2.53183
			hsa_circ_0135599	<0.001	2.0762	hsa_circ_0034370	0.00406902	2.00726
			hsa_circ_0029870	<0.001	2.12939	hsa_circ_0072730	0.00229627	2.2949
			hsa_circ_0128169	0.0190828	2.24144	hsa_circ_0071250	0.00197337	3.06845
			hsa-circRNA12520-31	0.00194643	2.21481	hsa_circ_0105779	<0.001	2.27177
			hsa-circRNA9834-7	0.0241649	2.04219	hsa_circ_0038424	0.00170548	2.07807
			hsa_circ_0117172	0.0091718	2.14089	hsa_circ_0069885	0.00313428	2.04373
			hsa_circ_0074588	<0.001	2.10657	hsa-circRNA11783-2	<0.001	2.4158
			hsa_circ_0034966	0.0178507	2.00753	hsa-circRNA4380-6	<0.001	2.01207
			hsa_circ_0140080	<0.001	2.24148	hsa_circ_0053657	<0.001	2.06122
			hsa-circRNA12520-47	<0.001	2.54594	hsa-circRNA3069-7	<0.001	2.16094
			hsa_circ_0127442	<0.001	2.00777	hsa_circ_0126839	<0.001	2.17864
			hsa_circ_0119266	<0.001	2.38982	hsa-circRNA13479-39	0.00502582	2.81254
			hsa_circ_0072733	0.00461801	2.02471	hsa_circ_0016790	0.00370224	2.85967
						hsa_circ_0062796	0.0373558	2.02537
